# Supplementary material
Source: publisher site journal article supplement (https://www.spandidos-publications.com/5740/downloadSupplementary)
Supplement: Supplementary file 1 [file downloadSupplementary]

## Sheet: Sheet1
Table SIV. DEGFRs extracted from GSE58486 and GSE160516
HMOX1
CYBB
IL1B
CAPG
CD44
CDKN1A
IL33
ASNS
PTGS2
TGFBR1
SLC7A5
TGFB1
SAT1
EGFR
PANX1
PGD
P4HB
HELLS
G6PDX
HIF1A
PPARA
FNDC5
LPIN1
GPT2
SLC2A12
PEX10
HERPUD1
ENPP2
IDH2
VLDLR
ULK1
IL6
ATF3
NCF2
STING1
PSAT1
ARNTL
CXCL2
CDCA3
ARF6
NRAS
CGAS
SLC7A11
LRRFIP1
RIPK1
SLC2A1
TXNRD1
TLR4
NR1D1
FBXW7
ATG4D
